# Supplementary material for: Experience with a hybrid recruitment approach of patient-facing web portal screening and subsequent phone and medical record review for a neurosurgical intervention trial for chronic ischemic stroke disability (PISCES III)
Source: PubMed Central journal article supplement (PMC10900735; doi:10.1186/s13063-024-07988-z), 2024-02-28
Supplement: 13063_2024_7988_MOESM1_ESM.pdf [file 13063_2024_7988_MOESM1_ESM.pdf]

## Appendix 1: Full Inclusion/Exclusion criteria for PISCES III

| Inclusion                                                                                                                                                                                                                                                                                                                                                                                                                                                                                                                                                                                                                                                                                                                                                                                                                                                                                                                                                                                                                                                                                                                                                                                                                                                                                                                                                                                                                                                                                                                                                                                                                                                                                                                                                                                                                                                                                                                                                          | Exclusion                                                                                                                                                                                                                                                                                                                                                                                                                                                                                                                                                                                                                                                                                                                                                                                                                                                                                                                                                                                                                                                                                                                                                                                                                                                                                                                                                                                                                                                                                                                                                                                                                                                                                                                                                                                                                                                                                                                                                                                                                                                                                                                                                                                                                                                                                                                                        |
|--------------------------------------------------------------------------------------------------------------------------------------------------------------------------------------------------------------------------------------------------------------------------------------------------------------------------------------------------------------------------------------------------------------------------------------------------------------------------------------------------------------------------------------------------------------------------------------------------------------------------------------------------------------------------------------------------------------------------------------------------------------------------------------------------------------------------------------------------------------------------------------------------------------------------------------------------------------------------------------------------------------------------------------------------------------------------------------------------------------------------------------------------------------------------------------------------------------------------------------------------------------------------------------------------------------------------------------------------------------------------------------------------------------------------------------------------------------------------------------------------------------------------------------------------------------------------------------------------------------------------------------------------------------------------------------------------------------------------------------------------------------------------------------------------------------------------------------------------------------------------------------------------------------------------------------------------------------------|--------------------------------------------------------------------------------------------------------------------------------------------------------------------------------------------------------------------------------------------------------------------------------------------------------------------------------------------------------------------------------------------------------------------------------------------------------------------------------------------------------------------------------------------------------------------------------------------------------------------------------------------------------------------------------------------------------------------------------------------------------------------------------------------------------------------------------------------------------------------------------------------------------------------------------------------------------------------------------------------------------------------------------------------------------------------------------------------------------------------------------------------------------------------------------------------------------------------------------------------------------------------------------------------------------------------------------------------------------------------------------------------------------------------------------------------------------------------------------------------------------------------------------------------------------------------------------------------------------------------------------------------------------------------------------------------------------------------------------------------------------------------------------------------------------------------------------------------------------------------------------------------------------------------------------------------------------------------------------------------------------------------------------------------------------------------------------------------------------------------------------------------------------------------------------------------------------------------------------------------------------------------------------------------------------------------------------------------------|
| <ol style="list-style-type: none"> <li>1. Written informed consent or witnessed informed consent in the event that the subject is unable to sign informed consent.</li> <li>2. Ischemic stroke that includes the supratentorial region occurring within 6 to 12 months of the time that surgical intervention will be performed (Qualifying Stroke Event)</li> <li>3. Aged between 35 and 75 (inclusive)</li> <li>4. Qualifying Stroke Event must be confirmed by CT or MRI</li> <li>5. Must have current Moderate or Moderately Severe disability as measured by modified Rankin Score = 3 or 4 due to the Qualifying Stroke Event</li> <li>6. Must have some residual upper limb movement as defined by the GRASP manual e.g. ability to actively shoulder shrug against gravity and wrist extension (palpable by the investigator; or visible lift of the fingers with hand on table)</li> <li>7. Must have sufficient cognitive and language abilities to comprehend verbal commands for study assessments</li> <li>8. No medical conditions that would preclude neurosurgery with appropriate preparation and management.</li> <li>9. Sufficient putamen, globus pallidus or caudate nucleus volume to enable delivery of the CTX0E03 DP</li> <li>10. Able to attend study related Visits and complete any diary, telephone or questionnaire assessments</li> <li>11. Females of childbearing potential (FOCBP), (or within 2 years of last menstrual cycle) must have a confirmed negative pregnancy test at time of treatment and agree to use two reliable methods of contraception (e.g. oral contraceptive and condom, intra-uterine device and condom, diaphragm with spermicide and condom) for six months following surgery</li> <li>12. Sexually active males with partners who are FOCBP must be willing to use a reliable method of contraception (e.g. barrier and spermicide or as described above) for six months following surgery.</li> </ol> | <ol style="list-style-type: none"> <li>1. Permanent disability corresponding to a Modified Rankin Score of &gt;1 prior to the Qualifying Stroke Event.</li> <li>2. Stroke due to hemorrhage or related-to connective tissue disorder, congenital disorder of the cerebral vessels or a disorder of thrombosis Subjects with atrial fibrillation as a suspected cause of stroke are NOT excluded.</li> <li>3. Neurosurgical pathway obstructed by vascular malformation or cavity</li> <li>4. History of neurological or other disease resulting in significant functional impairment</li> <li>5. Any contraindications to either CT scan or MRI</li> <li>6. Inability to stop or transition off valproic acid or other demethylating agents or HDAC inhibitors for 1 week before and 4 weeks after treatment with CTX0E03 DP</li> <li>7. Use of selective serotonin reuptake inhibitors (SSRI), unless the subject is on a stable dose that has been started at least 2 months before screening</li> <li>8. Use of antispasticity medications (excluding oral antispasticity medications if they have been taken regularly for at least four months prior to treatment with CTX0E03)</li> <li>9. Inability to discontinue anticoagulation therapy</li> <li>10. Severe comorbid disorder that has reasonable likelihood of limiting survival to less than 24 months.</li> <li>11. History of malignant disease within the last 5 years, (excluding benign tumors such as non-melanoma skin cancer, cervical carcinoma in situ, superficial bladder cancer)</li> <li>12. Any history of primary or secondary brain malignant disease.</li> <li>13. Previous participation in a cell-based therapy study at any time or in any other study involving an investigational product or rehabilitation study within the last 30 days</li> <li>14. Clinically significant laboratory values, including positive Class I HLA antibodies specific for CTX0E03, during screening</li> <li>15. Inability to adhere to the study post-surgery upper limb standard PT regimen e.g. excessive spasticity or pain</li> <li>16. Planned initiation of any other new physical therapy regimen within 6-months post-treatment</li> <li>17. Any other conditions that, in the opinion of the investigators, would preclude safe or effective participation</li> </ol> |

CT (computed tomography); CTX0E03 (investigational product); FOCBP (female of child bearing potential); GRASP (graded repetitive arm supplementary program); HDAC (histone deacetylase inhibitor); HLA (human leukocyte antigen); MRI (magnetic resonance imaging); PT (Physical Therapy)
